# Supplementary material for: A Potential Oncogenic Role for PFKFB3 Overexpression in Gastric Cancer Progression
Source: PubMed Central journal article supplement — Clin Transl Gastroenterol. 2021 Jul 1;12(7):e00377. doi: 10.14309/ctg.0000000000000377 (PMC8345915; doi:10.14309/ctg.0000000000000377), 2021-07-01

**Supplementary Figure 1. Correlation of PFKFB3 expression level with HIF-1 $\alpha$ , Ki-67, and epithelial–mesenchymal transition (EMT) markers.** IHC was used to determine the protein expression level of PFKFB3 and HIF-1 $\alpha$ , Ki-67, EMT markers E-cadherin, Vimentin, and Snail. The IHC score of PFKFB3 is plotted with the IHC score of HIF-1 $\alpha$ , Ki-67, EMT markers (A-E). Note that PFKFB3 expression level is negatively correlated with E-cadherin but positively correlated with HIF-1 $\alpha$ , Ki-67, Vimentin, and Snail.

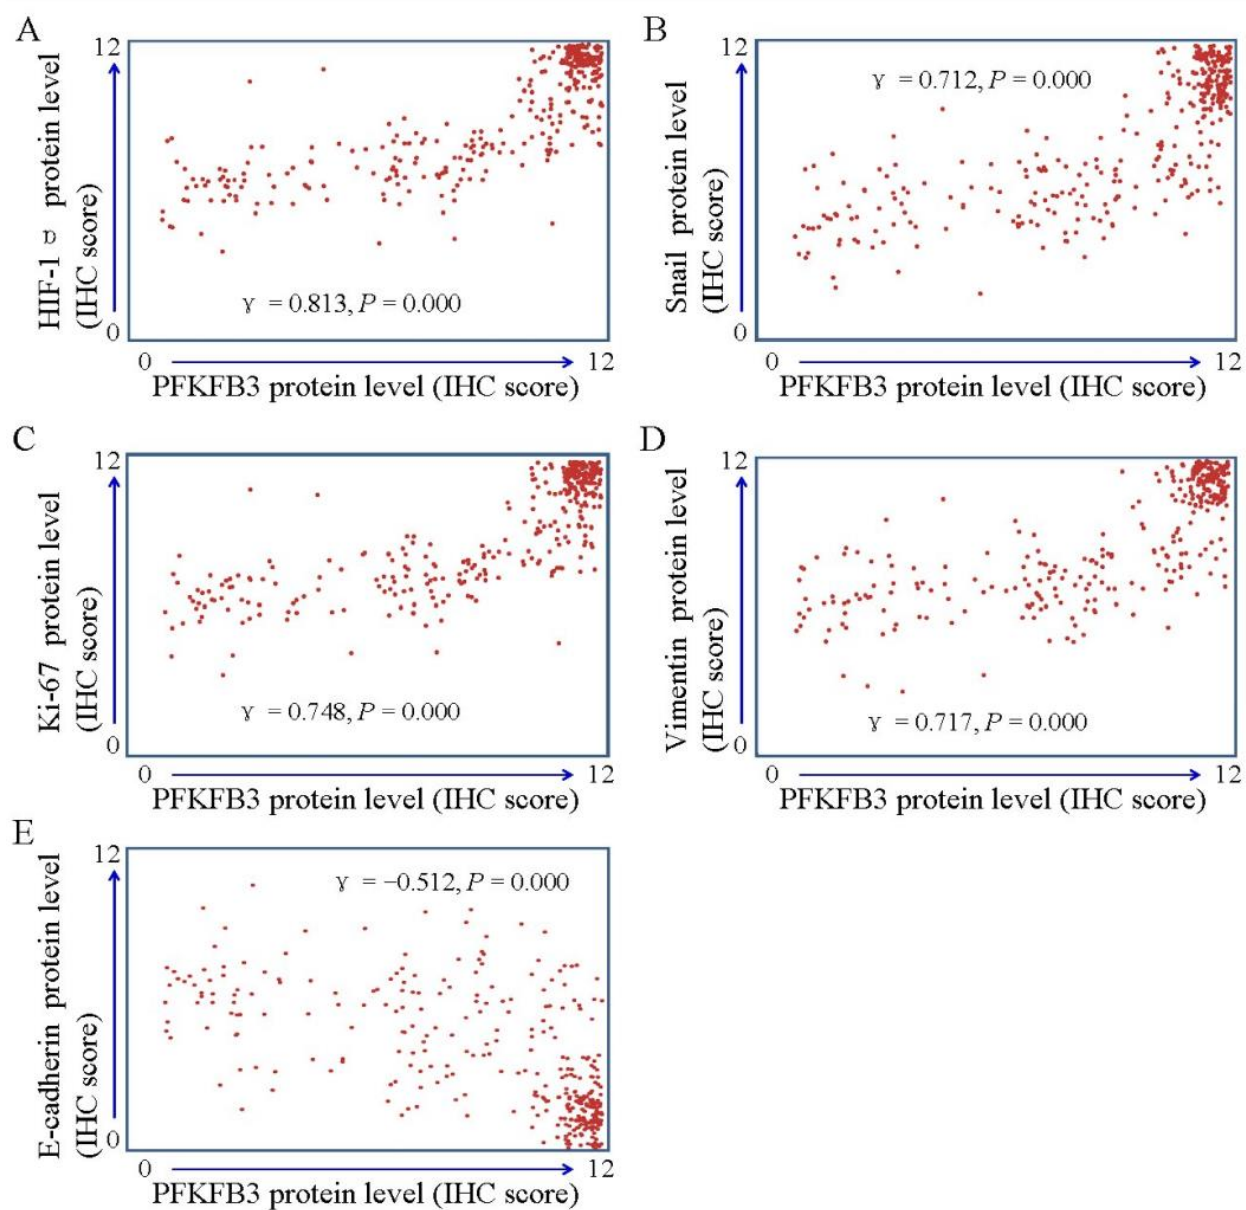

Supplement: ct9-12-e00377-s002.pdf [file ct9-12-e00377-s002.pdf]
